# Supplementary material for: The Novel Compound Heterozygous Mutations of ECEL1 Identified in a Family with Distal Arthrogryposis Type 5D
Source: PubMed Central journal article supplement (PMC7273484; doi:10.1155/2020/2149342), 2020-05-23
Supplement: 2149342.f1.pdf [file 2149342.f1.pdf]

**Supplementary Table 1.** Causative/potential causative genes of AMC.

|                 |                |                 |                |                |                 |                 |
|-----------------|----------------|-----------------|----------------|----------------|-----------------|-----------------|
| <i>ACTA1</i>    | <i>ADAMS10</i> | <i>ADAMTSL2</i> | <i>ADCY6</i>   | <i>ADGRG6</i>  | <i>ADSL</i>     | <i>AKT1</i>     |
| <i>ANTXR2</i>   | <i>AP1S2</i>   | <i>ARX</i>      | <i>ASXL1</i>   | <i>ATRX</i>    | <i>B3GAT3</i>   | <i>BIN1</i>     |
| <i>CANT1</i>    | <i>CASK</i>    | <i>CATSAL</i>   | <i>CATSHL</i>  | <i>CD96</i>    | <i>CHAT</i>     | <i>CHRNA1</i>   |
| <i>CHRNB1</i>   | <i>CHRND</i>   | <i>CHRNE</i>    | <i>CHRNA3</i>  | <i>CHST14</i>  | <i>CMG2</i>     | <i>CNTN1</i>    |
| <i>CNTNAP1</i>  | <i>COFS</i>    | <i>COL1A1</i>   | <i>COL1A2</i>  | <i>COL1A5</i>  | <i>COL2A1</i>   | <i>COL6A1</i>   |
| <i>COL6A2</i>   | <i>COL6A3</i>  | <i>COL7A1</i>   | <i>COLEC10</i> | <i>COLEC11</i> | <i>CRLF1</i>    | <i>DCX</i>      |
| <i>DHCR7</i>    | <i>DNM2</i>    | <i>DOK7</i>     | <i>DRG2</i>    | <i>DTDST</i>   | <i>DYM</i>      | <i>EBP</i>      |
| <i>ECEL1</i>    | <i>EIF2S3</i>  | <i>EMG1</i>     | <i>ERBB3</i>   | <i>ERCC1</i>   | <i>ERCC2</i>    | <i>ERCC5</i>    |
| <i>ERCC6</i>    | <i>ERG2</i>    | <i>ESCO2</i>    | <i>FBN1</i>    | <i>FBN2</i>    | <i>FCMD</i>     | <i>FGD1</i>     |
| <i>FGF9</i>     | <i>FGFR1</i>   | <i>FGFR2</i>    | <i>FGFR3</i>   | <i>FHL1</i>    | <i>FKBP10</i>   | <i>FKRP</i>     |
| <i>FKTN</i>     | <i>FLNA</i>    | <i>FLNB</i>     | <i>FLVCR2</i>  | <i>GBA</i>     | <i>GDF5</i>     | <i>GJA1</i>     |
| <i>GLE1</i>     | <i>GLI3</i>    | <i>GLRA1</i>    | <i>GLRB</i>    | <i>GPC3</i>    | <i>GRUL3</i>    | <i>HOXA13</i>   |
| <i>HOXD13</i>   | <i>HSPG2</i>   | <i>IMPAD1</i>   | <i>INSR</i>    | <i>IRF6</i>    | <i>KAT6B</i>    | <i>KCNA1</i>    |
| <i>KIAA0196</i> | <i>KIF7</i>    | <i>LARGE</i>    | <i>LICAM</i>   | <i>LIS1</i>    | <i>LMBR1</i>    | <i>LMX1B</i>    |
| <i>MASP1</i>    | <i>MED12</i>   | <i>MHS3</i>     | <i>MMP2</i>    | <i>MNX1</i>    | <i>MPZ</i>      | <i>MTM1</i>     |
| <i>MUSK</i>     | <i>MYBPC1</i>  | <i>MYH3</i>     | <i>MYH8</i>    | <i>NEB</i>     | <i>NF1</i>      | <i>NOG</i>      |
| <i>NSD1</i>     | <i>OFD1</i>    | <i>PAFAH1B1</i> | <i>PAX3</i>    | <i>PEHO</i>    | <i>PEX1</i>     | <i>PEX12</i>    |
| <i>PEX14</i>    | <i>PEX2</i>    | <i>PEX26</i>    | <i>PEX3</i>    | <i>PEX5</i>    | <i>PEX6</i>     | <i>PEX7</i>     |
| <i>PFKM</i>     | <i>PIEZO2</i>  | <i>PIP5K1C</i>  | <i>PLOD1</i>   | <i>PLOD2</i>   | <i>PM11</i>     | <i>PMM2</i>     |
| <i>PMP22</i>    | <i>PMPK</i>    | <i>POMGNT1</i>  | <i>POMT1</i>   | <i>POMT2</i>   | <i>POR</i>      | <i>PRG4</i>     |
| <i>PRX</i>      | <i>PTDSS1</i>  | <i>PTHR</i>     | <i>PTLAH</i>   | <i>RAB18</i>   | <i>RAB3GAP1</i> | <i>RAB3GAP2</i> |
| <i>RAPSN</i>    | <i>RBM10</i>   | <i>RELN</i>     | <i>RET</i>     | <i>RIPK4</i>   | <i>RNASEH2A</i> | <i>RNASEH2B</i> |
| <i>RNASEH2C</i> | <i>RYR1</i>    | <i>SAMHD1</i>   | <i>SCARF2</i>  | <i>SELENON</i> | <i>SEPN2</i>    | <i>SETBP1</i>   |
| <i>SHOX</i>     | <i>SLC05A1</i> | <i>SLC26A2</i>  | <i>SLC9A6</i>  | <i>SLC05A1</i> | <i>SMARCA1</i>  | <i>SMN</i>      |
| <i>SOX9</i>     | <i>SULF1</i>   | <i>SYNE1</i>    | <i>TARP</i>    | <i>TBX22</i>   | <i>TBX5</i>     | <i>TNNI2</i>    |
| <i>TNNT3</i>    | <i>TPM2</i>    | <i>TPM3</i>     | <i>TREX1</i>   | <i>TRPV4</i>   | <i>TSC1</i>     | <i>TSC2</i>     |
| <i>UBA1</i>     | <i>UBE1</i>    | <i>UPK3A</i>    | <i>VIPAR</i>   | <i>VPS33B</i>  | <i>WNT7A</i>    | <i>ZBTB42</i>   |
| <i>ZC4H2</i>    | <i>ZIC3</i>    |                 |                |                |                 |                 |
